# Supplementary material
Source: PubMed Central journal article supplement (PMC3147683)

Figure S1

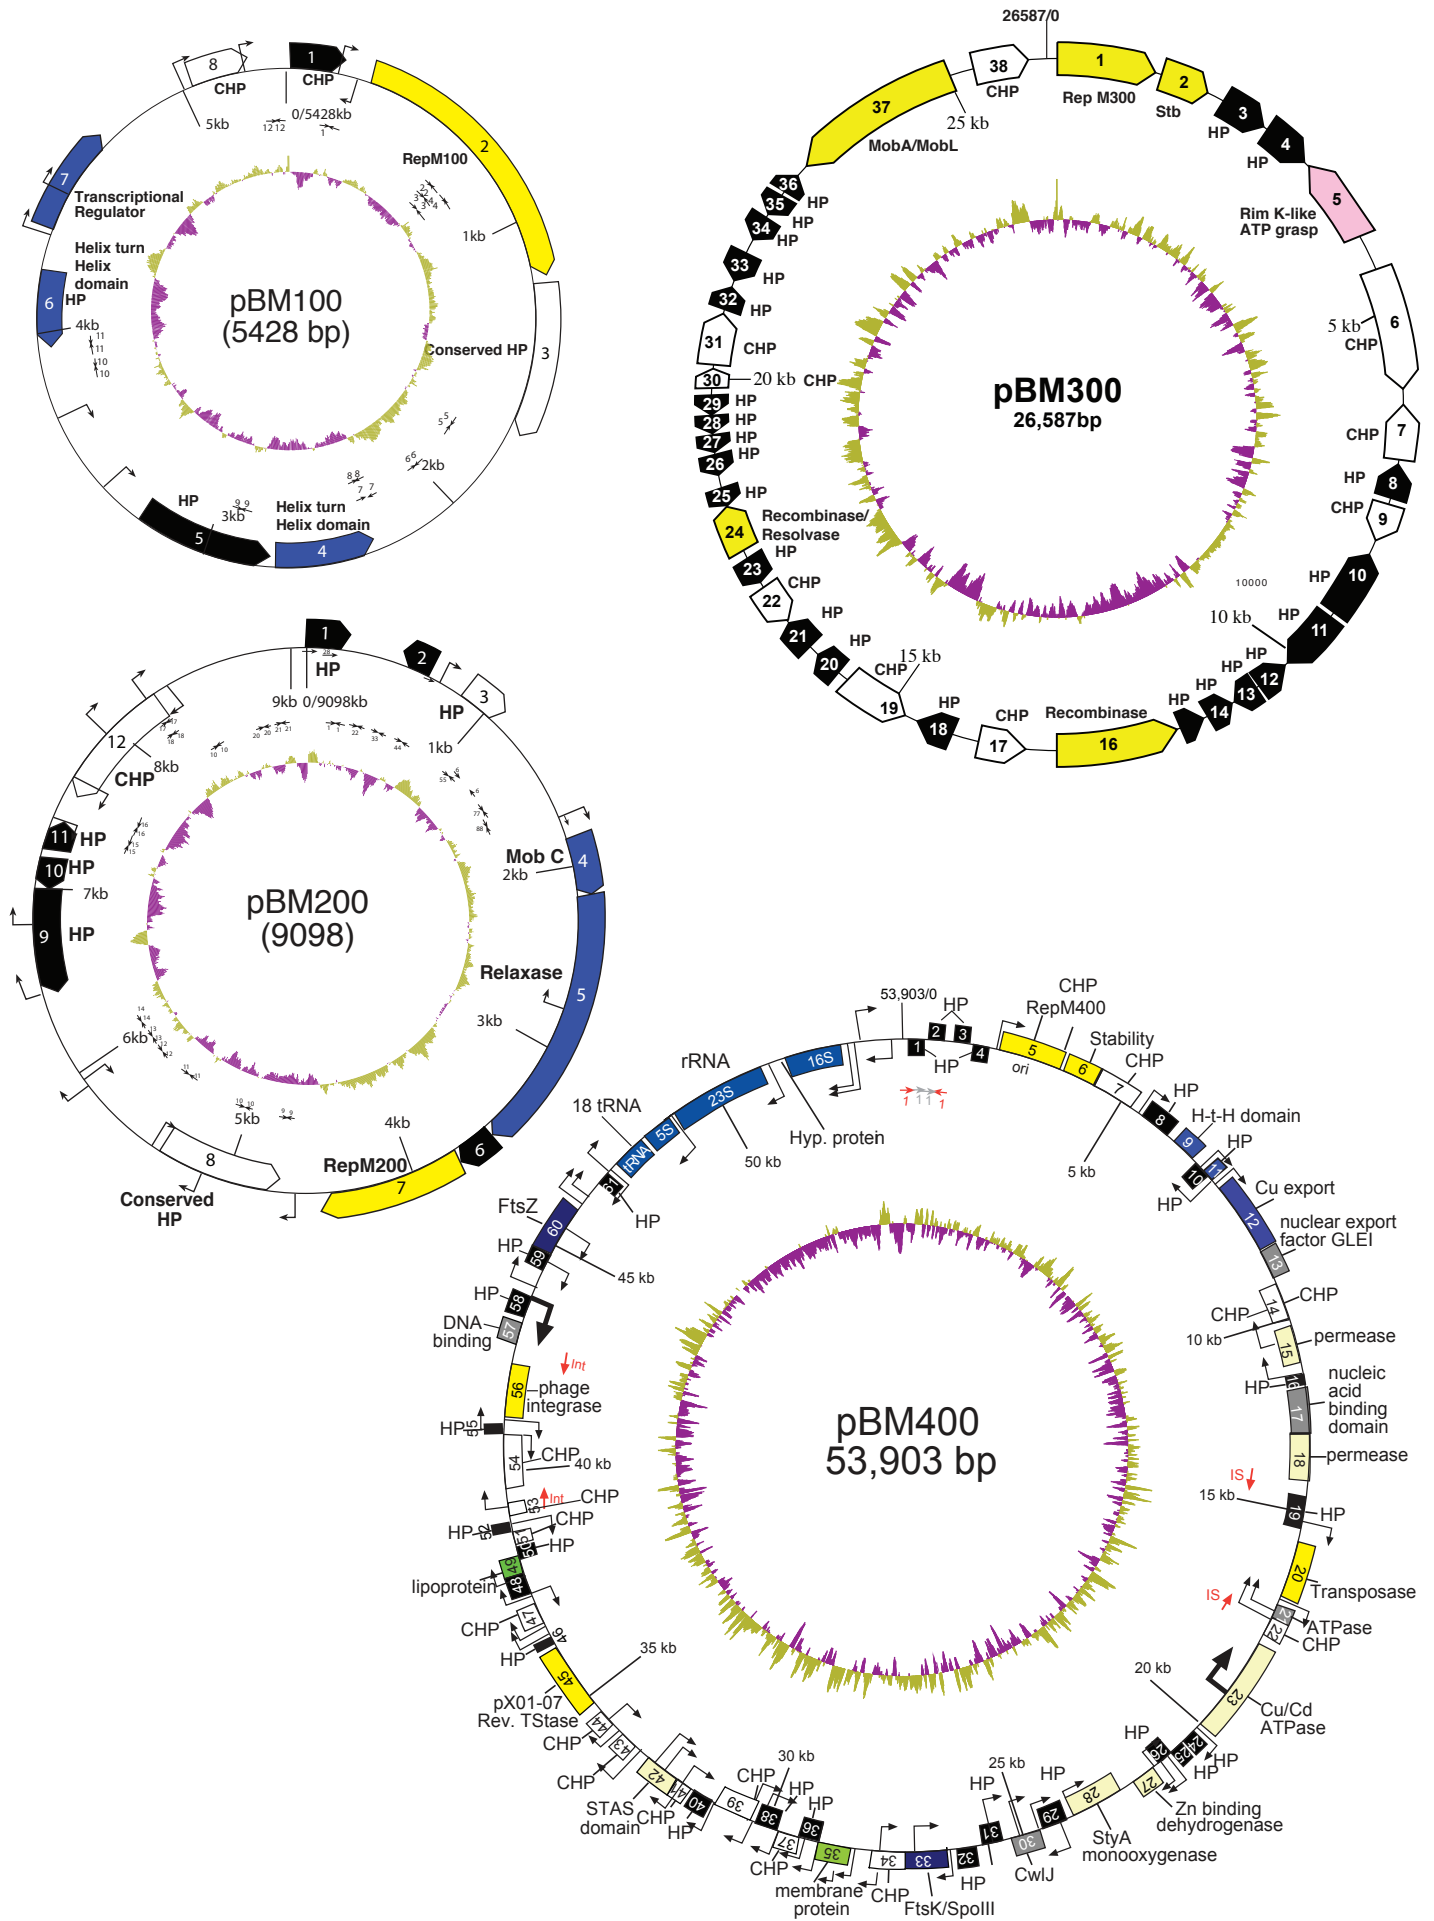

Supplement: supp_193_16_4199__1.pdf [file supp_193_16_4199__1.pdf]
